# Supplementary figures and images for: Grafting of a chiral Mn(iii) complex on graphene oxide nanosheets and its catalytic activity for alkene epoxidation
Source: Royal Society of Chemistry journal article supplement (doi:10.1039/c4ra03047h), 2014-01-01

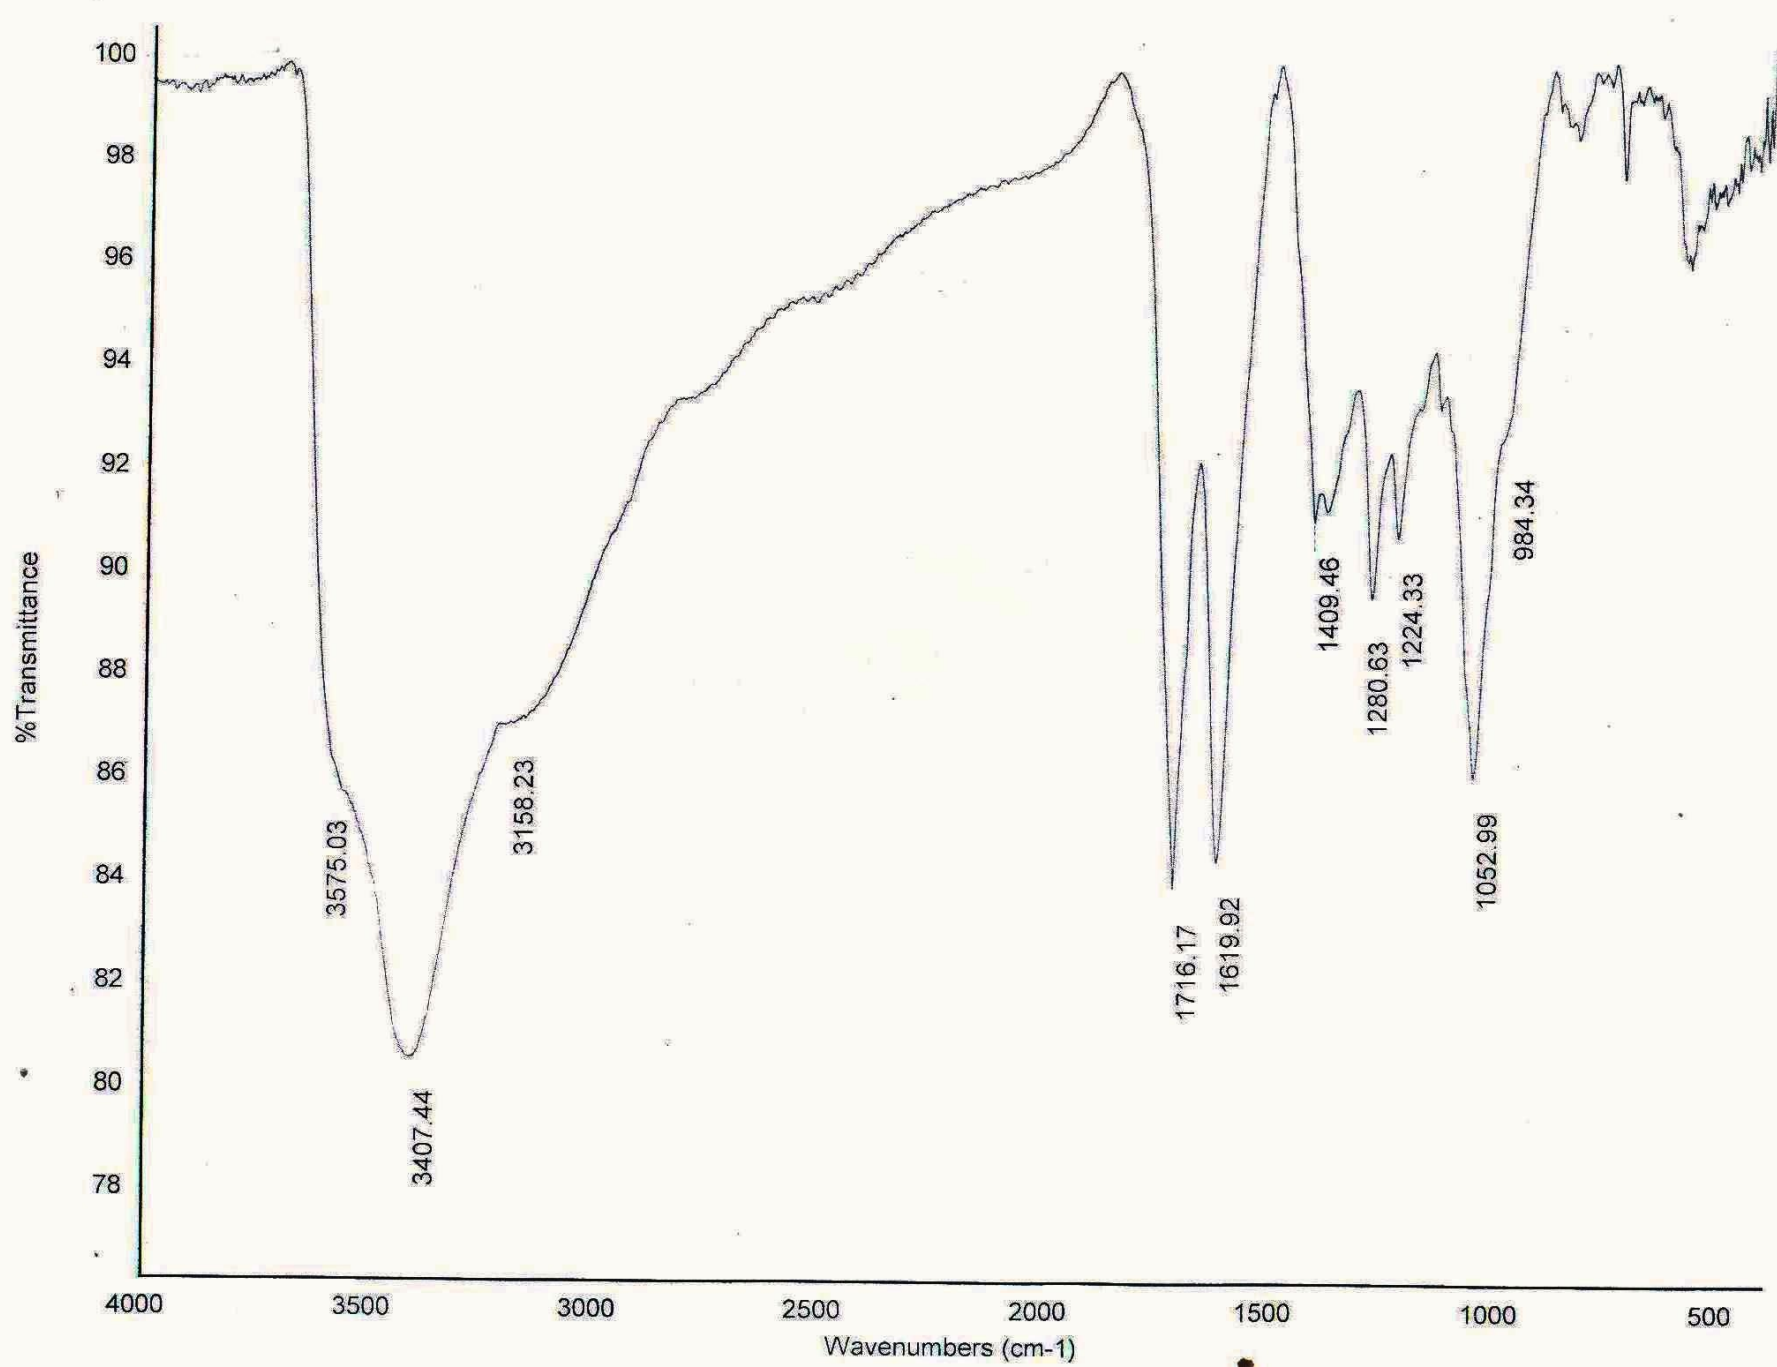

Supplement: c4ra03047h1.pdf [file c4ra03047h1.pdf]
